# Supplementary material
Source: PubMed Central journal article supplement (PMC3075795)
Supplement: pp.110.166967_1.pdf [file pp.110.166967_1.pdf]

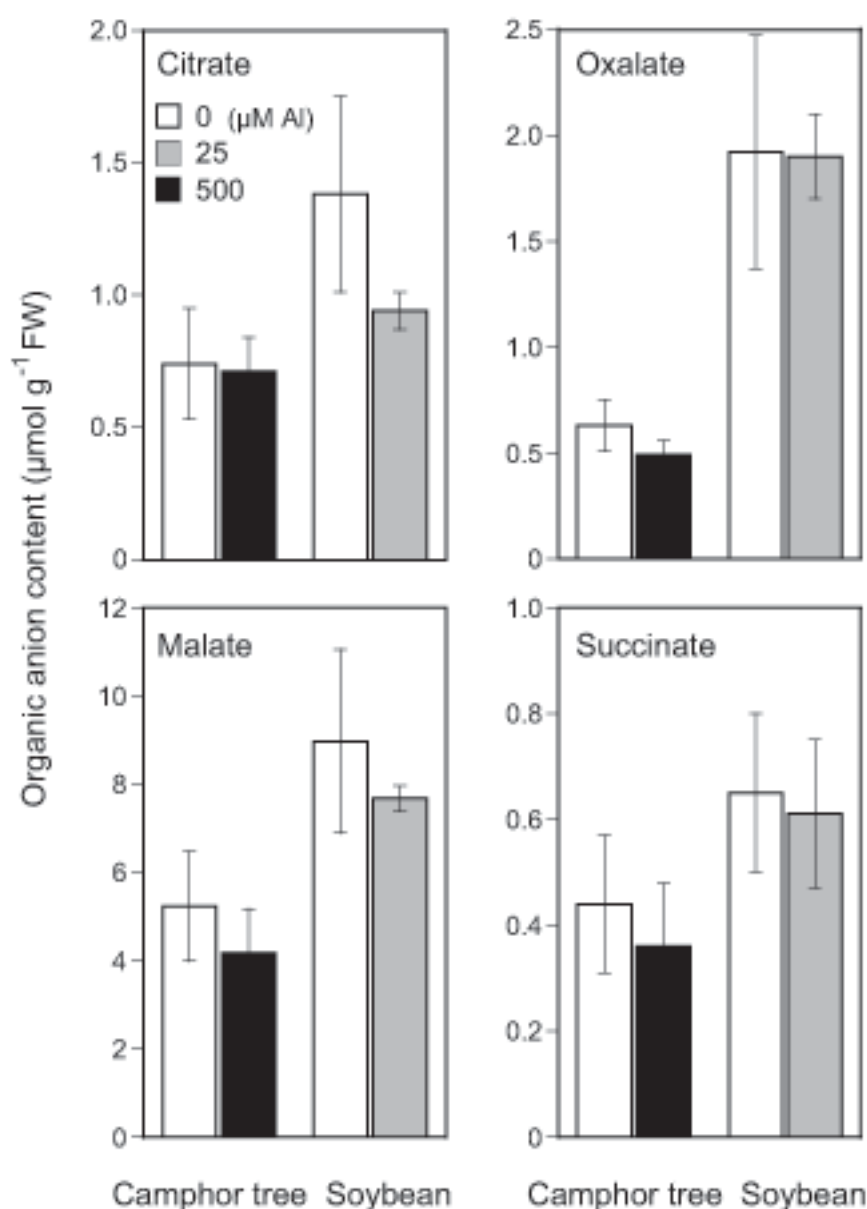

Supplemental Figure S1

**Supplemental Figure S1. Contents of organic anions in root apices of camphor tree and soybean.**

After the exposure to 0.5 mM calcium chloride solution (pH 4.5) containing 0, 25, or 500  $\mu\text{M}$  Al for 24 h, root tips in 5 mm length were cut and frozen at  $-80^{\circ}\text{C}$ . Before thawing, the roots were homogenized with ice-cold 70% (v/v) ethanol for 3 min at 4,500 rpm in a bead beater (Micro Smash MS100, Tomy Co., Tokyo, Japan). After centrifugation at 20,000 g for 10 min, the supernatant were evaporated to dryness in a rotary evaporator. The dried samples were dissolved into distilled water and filtrated through 0.22  $\mu\text{m}$  pore-size membrane filters. Data represent means  $\pm$  SD (n=3).
