# Supplementary material
Source: PubMed Central journal article supplement (PMC3075795)
Supplement: pp.110.166967_2.pdf [file pp.110.166967_2.pdf]

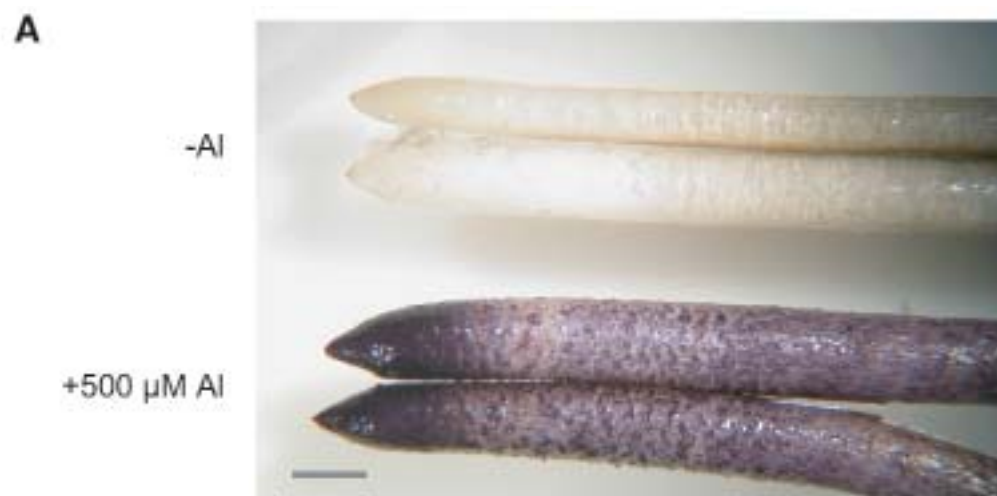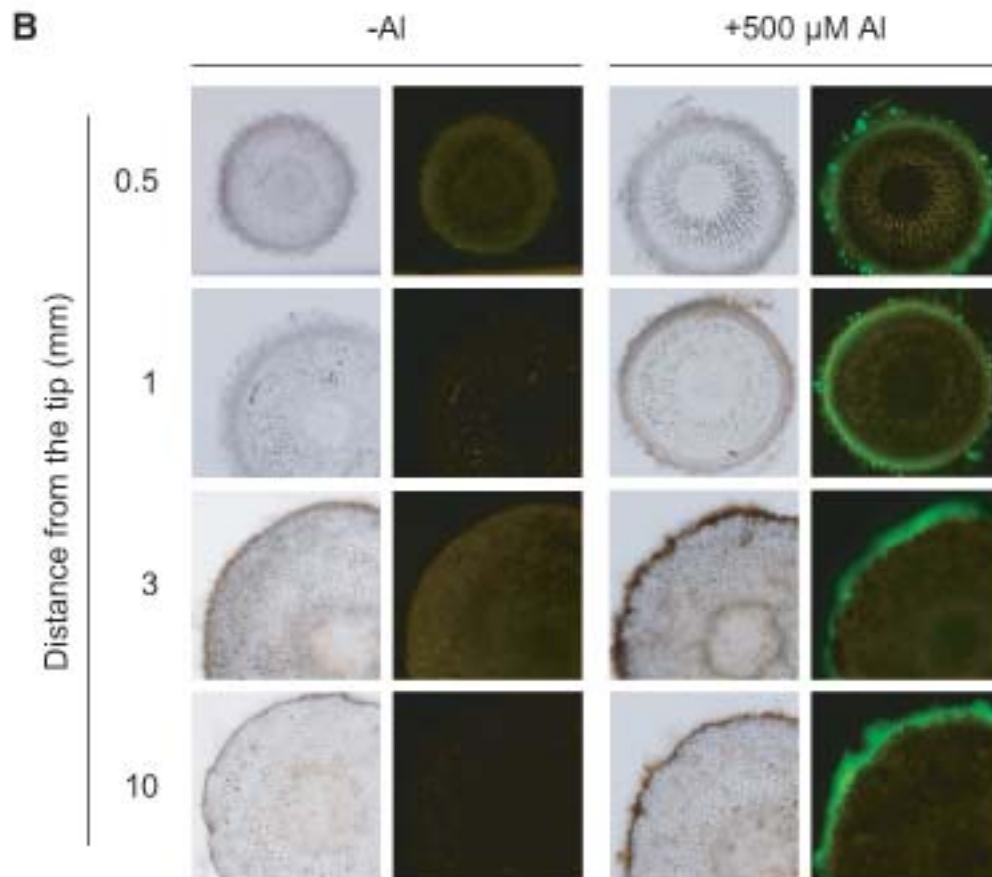

**Supplemental Figure S2. Localization of Al in roots of camphor tree.**

After the exposure to 0.5 mM calcium chloride solution (pH 4.5) containing 0 or 500  $\mu\text{M}$  Al for 24 h, roots were stained with hematoxylin or morin. **A**, Hematoxylin-stained roots. After the Al treatment, roots were washed three times with deionized water and stained with 0.2 % (w/v) hematoxylin for 10 min. **B**, Bright-field and fluorescence images of camphor tree roots. After the Al treatment followed by washing with deionized water, roots were stained with 100  $\mu\text{M}$  morin for 30 min. Transverse sections of roots at each distance from the tip were prepared by hand using a razor-blade. The emission of Al-morin complexes was observed with a fluorescence microscope using a 460–495 nm excitation filter, a 505 nm DCLP mirror, and a 510 nm emission filter. Bars represent 1 mm in **A**, and 100  $\mu\text{m}$  in **B**.
