# Supplementary material
Source: PubMed Central journal article supplement (PMC3075795)
Supplement: pp.110.166967_3.pdf [file pp.110.166967_3.pdf]

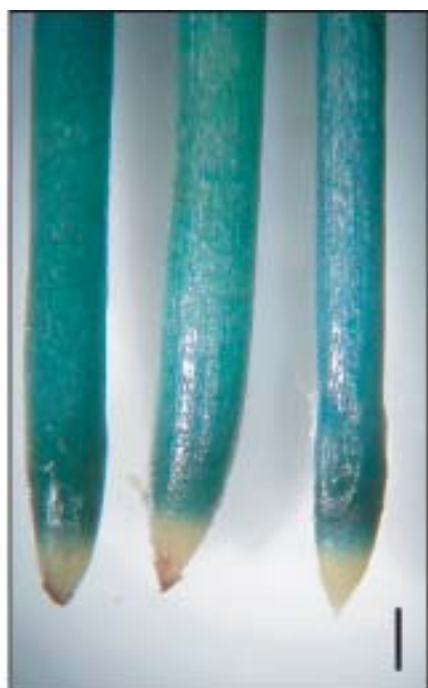

Supplemental Figure S3

**Supplemental Figure S3. Proanthocyanidin accumulation in roots of camphor tree.**

The roots stained with 2% (w/v) p-dimethylaminocinnamaldehyde (DMACA) in a 1:1 mixture of 50% (v/v) methanol and 3N HCl for 2 min are shown. The bar represents 1 mm.
