# Supplementary material
Source: PubMed Central journal article supplement (PMC3075795)
Supplement: pp.110.166967_4.pdf [file pp.110.166967_4.pdf]

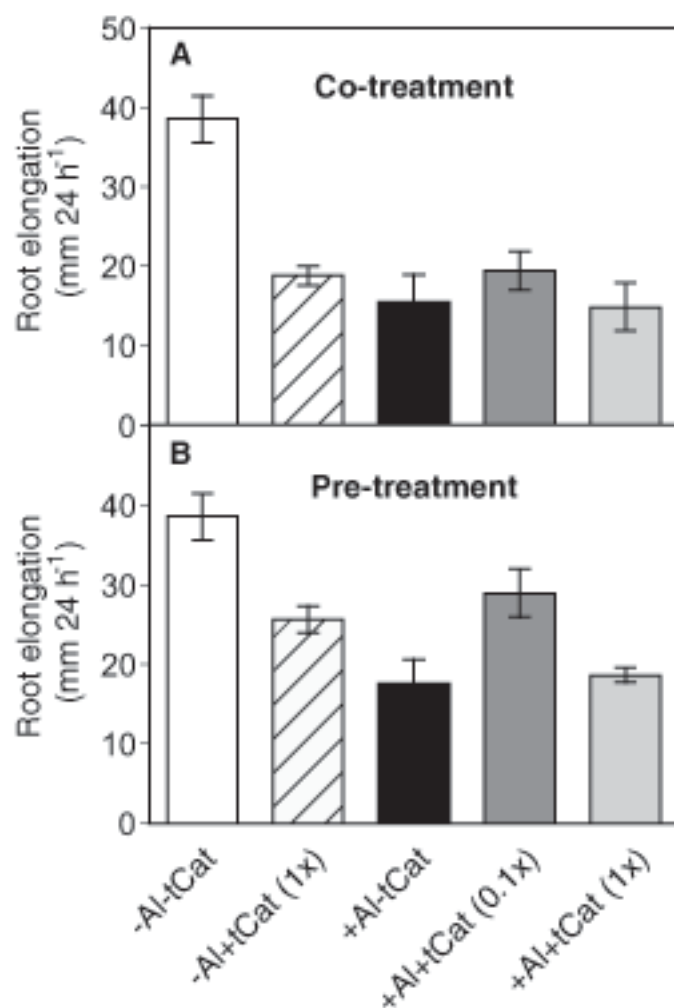

Supplemental Figure S4

**Supplemental Figure S4. Effect of exogenous application of PA components from tea leaves on the amelioration of Al-induced inhibition of root elongation in soybean.**

Soybean roots were exposed to 500  $\mu\text{M}$  calcium chloride solution (pH 4.5) with or without 25  $\mu\text{M}$  Al and 57.5  $\text{mg L}^{-1}$  of a mixture of flavan-3-ol extract. Flavan-3-ol concentrations in the extracts were equivalent to 14.3, 40.6, 17.8, and 74.2  $\mu\text{M}$  for epicatechin, epigallocatechin, epicatechin gallate, and epigallocatechin gallate, respectively. **A**, Elongation of soybean roots after 24 h of treatment with Al (+Al-tCat), flavan-3-ols [-Al-tCat (1x)], or both [+Al-tCat (1x); +Al-tCat (0.1x)]. **B**, Elongation of soybean roots after 24 h of single treatment with Al (+Al-tCat) or flavan-3-ols [-Al-tCat (1x)] every 6 h, or after mutual treatments with Al and flavan-3-ols [+Al-tCat (1x); +Al-tCat (0.1x)] every 6 h. Data represent means  $\pm$  SD (n=6).
