# Supplementary material
Source: PubMed Central journal article supplement (PMC3075795)
Supplement: pp.110.166967_5.pdf [file pp.110.166967_5.pdf]

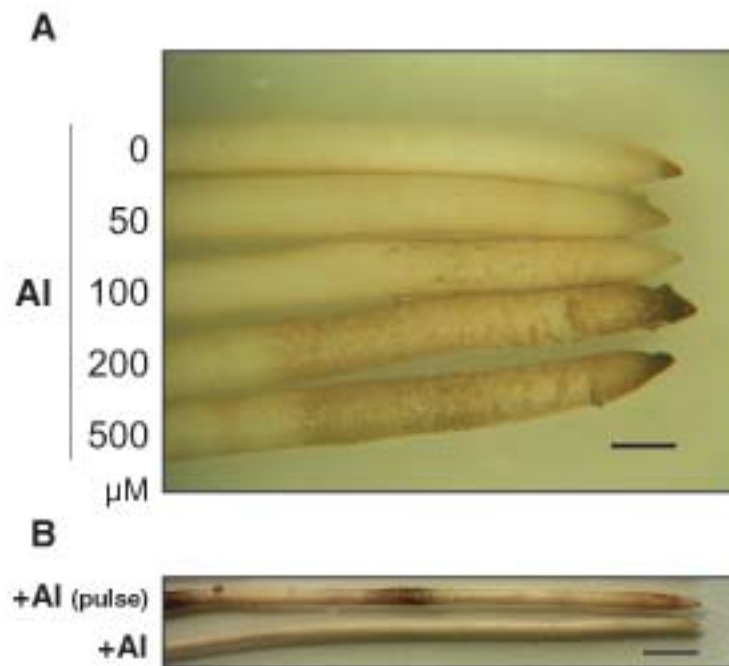

Supplemental Figure S5

**Supplemental Figure S5. Al-induced root browning in camphor tree roots.**

**A**, Al concentration intensifies short-term root browning in camphor tree. The roots were exposed to a 500  $\mu\text{M}$  calcium chloride solution containing 0, 50, 100, 200, or 500  $\mu\text{M}$  Al for 48 h. The bar represents 1 mm. **B**, Root browning in camphor tree is reproduced by intermittent Al exposure. The roots were exposed to 500  $\mu\text{M}$  calcium chloride solution containing 500  $\mu\text{M}$  Al every 2 days for a total of 6 days (top), or for entire 10 days (below). Browning traces are corresponded to the root apex position when the root was exposed to Al. The bar represents 5 mm.
